# Supplementary material for: Integrative Magnetic Resonance Imaging and Metabolomic Characterization of a Glioblastoma Rat Model
Source: MDPI journal article supplement (doi:10.3390/brainsci14050409), 2024-04-23
Supplement: s1 [file s1]

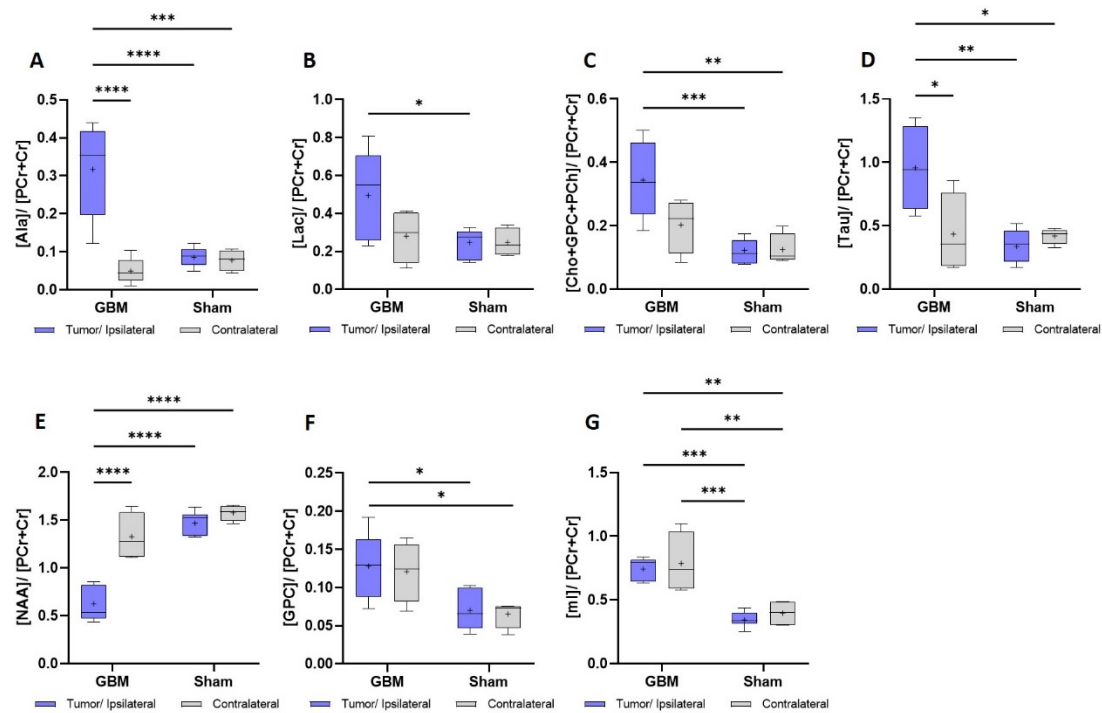

**Figure S1.** Metabolic data obtained from  $^1\text{H}$  HRMAS spectra with a TE= 144 ms from tumor and contralateral regions of GBM rats and ipsilateral and contralateral regions of Sham rats. Metabolic concentrations are expressed relative to phosphocreatine + creatine (PCr + Cr). A. Ala: alanine. B. Lac: lactate. C. Cho+GPC+PCh: choline + glycerophosphocholine + phosphocholine. D. Tau: taurine. E. NAA: N-acetylaspartic acid. F. GPC: glycerophosphocholine, G. mI: myo-inositol. \* $p < 0.05$ , \*\* $p < 0.01$ , \*\*\* $p < 0.001$  and \*\*\*\* $p < 0.0001$ .

**Table S1.** Metabolite concentrations (mean  $\pm$  SEM) obtained from *ex vivo*  $^1\text{H}$  HRMAS (TE= 144 ms) spectra from different regions of the studied groups. Metabolic concentrations are expressed relative to phosphocreatine + creatine (PCr + Cr).

| [Metabolite]/ [PCr + Cr] | GBM             |                 | Sham            |                 |
|--------------------------|-----------------|-----------------|-----------------|-----------------|
|                          | Tumor           | Contralateral   | Ipsilateral     | Contralateral   |
| Ala                      | 0.32 $\pm$ 0.06 | 0.05 $\pm$ 0.02 | 0.09 $\pm$ 0.01 | 0.08 $\pm$ 0.01 |
| Lac                      | 0.49 $\pm$ 0.11 | 0.28 $\pm$ 0.07 | 0.25 $\pm$ 0.03 | 0.25 $\pm$ 0.04 |
| Cho+GPC+PCh              | 0.34 $\pm$ 0.05 | 0.20 $\pm$ 0.04 | 0.12 $\pm$ 0.01 | 0.12 $\pm$ 0.02 |
| Tau                      | 0.96 $\pm$ 0.15 | 0.43 $\pm$ 0.16 | 0.34 $\pm$ 0.05 | 0.42 $\pm$ 0.03 |
| NAA                      | 0.63 $\pm$ 0.08 | 1.33 $\pm$ 0.13 | 1.47 $\pm$ 0.05 | 1.58 $\pm$ 0.04 |
| GPC                      | 0.13 $\pm$ 0.02 | 0.12 $\pm$ 0.02 | 0.07 $\pm$ 0.01 | 0.06 $\pm$ 0.01 |
| mI                       | 0.74 $\pm$ 0.04 | 0.79 $\pm$ 0.12 | 0.34 $\pm$ 0.02 | 0.40 $\pm$ 0.05 |

SEM: standard error of mean, TE: echo time, PCr+Cr: phosphocreatine + creatine, Ala: alanine, Lac: lactate, Cho+GPC+PCh: choline + glycerophosphocholine + phosphocholine, Tau: taurine, NAA: N-acetylaspartic acid, GPC: glycerophosphocholine. mI: myo-inositol.
